# Supplementary material for: Measurement of enthalpies and entropies of activation as a function of pairwise distance for the pairwise relative diffusion of SrI2 in water over lengthscales from 6 Å to 40 Å
Source: Royal Society of Chemistry journal article supplement (doi:10.1039/d2nj00712f), 2022-01-01
Supplement: d2nj00712f1.pdf [file d2nj00712f1.pdf]

**Supplement 1:** Data sheets for  $E_a$ ,  $\Delta^\ddagger S_r$ , and  $\Delta^\ddagger G_r$  graphs and Eq. 13  $\Delta^\ddagger S_r$  graph

Data sheet for  $E_a$

Label abbreviations: HT (Higher T range) and LT (Lower T range). Unc is the uncertainty/standard deviation  $\sigma$ . The adjusted  $r^2$  is modified for the degrees of freedom and is smaller than the directly calculated  $r^2$ . The 4pts value was used because it was not clear whether the line had a break.

| length | Slope $\ln D/d(1/T)$ | Unc_slope | $E_a$ (cal/mol) | Unc $E_a$ | q      | label | Adj $r^2$ |
|--------|----------------------|-----------|-----------------|-----------|--------|-------|-----------|
| 38.52  | -1669.2              | 162       | 3317.0          | 321.9     | 0.1631 | 5pts  | 0.9449    |
| 31.34  | -1484.7              | 55        | 2950.4          | 109.3     | 0.2005 | 5pts  | 0.9917    |
| 25.14  | -1553.3              | 76        | 3086.7          | 151.0     | 0.2499 | 5pts  | 0.9858    |
| 21.04  | -1611.8              | 135       | 3203.0          | 268.3     | 0.2987 | 5pts  | 0.9586    |
| 17.98  | -1691.6              | 75        | 3361.5          | 149.0     | 0.3494 | 5pts  | 0.9882    |
| 15.71  | -1636.5              | 59        | 3252.1          | 117.2     | 0.3999 | 5pts  | 0.9922    |
| 13.97  | -1614.8              | 80        | 3208.9          | 159.0     | 0.4499 | 5pts  | 0.9855    |
| 12.56  | -1615.0              | 79        | 3209.3          | 157.0     | 0.5001 | 5pts  | 0.9856    |
| 11.42  | -1634.8              | 99        | 3248.7          | 196.7     | 0.5501 | 5pts  | 0.9725    |
| 10.47  | -1588.0              | 54        | 3155.7          | 107.3     | 0.6001 | 5pts  | 0.9930    |
| 9.66   | -1456.6              | 79        | 2894.6          | 157.0     | 0.6502 | 5pts  | 0.9825    |
| 8.97   | -1484.6              | 53        | 2950.2          | 105.3     | 0.7001 | 5pts  | 0.9922    |
| 8.38   | -1743.6              | 77        | 3464.9          | 153.0     | 0.7502 | 5pts  | 0.9885    |
| 7.85   | -1664.8              | 149       | 3308.3          | 296.1     | 0.8002 | 5pts  | 0.9531    |
| 7.39   | -1595.7              | 103       | 3171.0          | 204.7     | 0.8503 | 5pts  | 0.9753    |
| 6.98   | -1724.5              | 122       | 3426.9          | 242.4     | 0.9004 | 5pts  | 0.9704    |
| 6.98   | -1656.0              | 99        | 3290.8          | 196.7     | 0.9000 | 4pts  | 0.9789    |
| 6.61   | -1704.6              | 173       | 3387.4          | 343.8     | 0.9504 | 5pts  | 0.9401    |
| 6.61   | -1714.2              | 156       | 3406.5          | 310.0     | 0.9500 | LT    | 0.9835    |
| 6.61   | -2267.7              | 70        | 4506.4          | 139.1     | 0.9500 | HT    | 0.9981    |
| 6.28   | -2628.0              | 184       | 5222.4          | 365.6     | 1.0000 | 5pts  | 0.9711    |
| 6.28   | -1758.2              | 113       | 3493.9          | 224.6     | 1.0000 | LT    | 0.9917    |
| 6.28   | -3193.0              | 388       | 6345.1          | 771.0     | 1.0000 | HT    | 0.9709    |

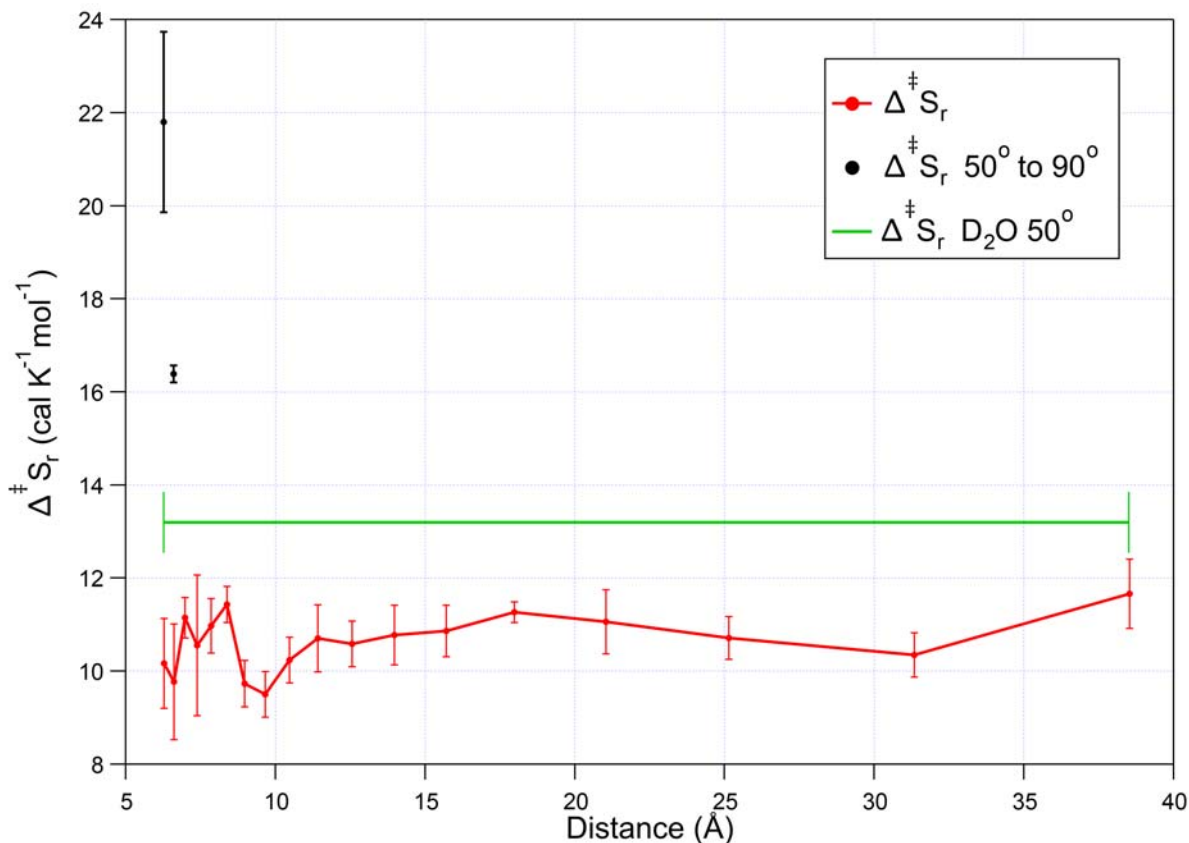

**Supplement Figure 1.** The values of  $\Delta^\ddagger S_r$  for pairwise diffusion *versus* distance from Equation 13. The vertical bars indicate the standard deviations of the slopes of the least squares lines found from the  $D_p$  values weighted by their individual experimental uncertainties. Due to the breaks at 50°C, the two shortest distances have two different  $\Delta^\ddagger S_r$  values, one in the range 10°C to 50°C and the other 50°C to 90°C. The flat line shows the macroscopic  $\Delta^\ddagger S_r$  for D<sub>2</sub>O at 50 °C found from the data of Prielmeier et al.<sup>48</sup> in the same manner as for the salt solutions. The numerical values for the graphed points are listed on the next page.

Data sheet for  $\Delta^{\ddagger}S_r$  for Figure Supp 1 calculated from Equation 13

Label abbreviations: HT (Higher T range) and LT (Lower T range). Unc is the uncertainty/standard deviation  $\sigma$ . The adjusted  $r^2$  is modified for the degrees of freedom and is smaller than the directly calculated  $r^2$ . The 4pts value was used because it was not clear whether the line had a break.

| Length | Slope_dlnD/d/dlnT | Del_Sr (e.u.) | UncSr       | q     | Adj_r2 | Label |
|--------|-------------------|---------------|-------------|-------|--------|-------|
| 38.52  | 5.201             | 11.66749251   | 0.741117227 | 0.163 | 0.9424 | 5 pts |
| 31.34  | 4.631             | 10.35402759   | 0.474117603 | 0.2   | 0.9848 | 5 pts |
| 25.14  | 4.852             | 10.71370819   | 0.457886168 | 0.25  | 0.9768 | 5 pts |
| 21.04  | 5.032             | 11.06560273   | 0.690055997 | 0.3   | 0.9452 | 5 pts |
| 17.98  | 5.308             | 11.26569216   | 0.22341095  | 0.35  | 0.9928 | 5 pts |
| 15.71  | 5.124             | 10.86512554   | 0.557471726 | 0.4   | 0.9866 | 5 pts |
| 13.97  | 5.152             | 10.77459832   | 0.642790607 | 0.45  | 0.9762 | 5 pts |
| 12.56  | 5.06              | 10.58417744   | 0.49201268  | 0.5   | 0.9774 | 5 pts |
| 11.41  | 5.125             | 10.70571779   | 0.72015387  | 0.55  | 0.9668 | 5 pts |
| 10.47  | 4.983             | 10.23949649   | 0.492153354 | 0.6   | 0.986  | 5 pts |
| 9.66   | 4.579             | 9.502632257   | 0.492416764 | 0.65  | 0.9756 | 5 pts |
| 8.97   | 4.67              | 9.731542383   | 0.502336411 | 0.7   | 0.9876 | 5 pts |
| 8.38   | 5.511             | 11.43419326   | 0.385976854 | 0.75  | 0.9876 | 5 pts |
| 7.85   | 5.256             | 10.97366864   | 0.582116398 | 0.8   | 0.9427 | 5 pts |
| 7.39   | 5.049             | 10.55469059   | 1.514964542 | 0.85  | 0.9759 | 5 pts |
| 6.98   | 5.362             | 11.14587737   | 0.432666832 | 0.9   | 0.9636 | 4 pts |
| 6.61   | 4.722             | 9.770514881   | 1.24322672  | 0.95  | 0.9551 | LT    |
| 6.28   | 4.9584            | 10.16529893   | 0.967688131 | 1     | 0.9731 | LT    |
|        |                   |               |             |       |        |       |
|        |                   |               |             |       |        |       |
| 6.61   | 8.248             | 16.93453905   | 0.193666919 | 0.95  | 1      | HT    |
| 6.28   | 10.971            | 21.8015712    | 1.942297712 | 1     | 0.9996 | HT    |

Data sheet for  $\Delta^{\dagger}G_r$  Figure 7

| q     | Distance    | DelGr_283    | UncGr_283    | DelGr_303    | uncGr_303    | DelGr_323    | UncGr_323    | DelGr_343    | UncGr_343    | DelGr_363    | UncGr_363    |
|-------|-------------|--------------|--------------|--------------|--------------|--------------|--------------|--------------|--------------|--------------|--------------|
| 0.163 | 38.5398773  | -51.29249486 | -106.0441449 | -202.4490975 | -98.16930368 | -556.2661238 | -94.22082031 | -748.3383883 | -104.2821731 | -943.4144566 | -129.6258816 |
| 0.2   | 31.41       | -29.00780656 | -57.97540312 | -277.5658202 | -57.5679339  | -473.5923031 | -59.31132444 | -659.2145272 | -63.01676344 | -894.3863391 | -79.63096541 |
| 0.25  | 25.128      | 28.29843621  | -45.40936333 | -241.1002346 | -46.83109121 | -433.8519048 | -49.71634087 | -621.1616914 | -54.8859724  | -862.2958206 | -70.95798486 |
| 0.3   | 20.94       | 104.1406847  | -42.24544499 | -142.567059  | -44.25032142 | -426.2892457 | -48.91958235 | -559.7402871 | -52.7887975  | -756.3266289 | -69.00921961 |
| 0.35  | 17.94857143 | 119.254374   | -53.5210246  | -98.21228432 | -57.49766692 | -279.0697813 | -61.49892669 | -546.7330035 | -67.25762838 | -817.3934832 | -88.59896046 |
| 0.4   | 15.705      | 188.4796361  | -51.49320982 | -30.18226671 | -55.41812443 | -263.8514023 | -60.94212747 | -478.6174588 | -68.42537747 | -650.0520475 | -87.95292417 |
| 0.45  | 13.96       | 247.3021906  | -47.74190988 | -13.98263679 | -54.1790081  | -201.6011378 | -61.50264626 | -422.3681644 | -68.39759653 | -592.02209   | -89.07210482 |
| 0.5   | 12.564      | 241.5955245  | -49.41640349 | 12.02012182  | -55.24157299 | -203.8550039 | -60.12795988 | -419.5684779 | -69.24807967 | -560.8796847 | -91.18222976 |
| 0.55  | 11.42181818 | 282.7263097  | -49.02981935 | 41.23617448  | -55.44919126 | -196.8067989 | -61.83013898 | -336.9154049 | -72.35397214 | -547.8787826 | -99.06039281 |
| 0.6   | 10.47       | 290.9947135  | -52.29336593 | 51.65788162  | -59.92340948 | -124.7611058 | -64.46096814 | -318.2141668 | -77.82501896 | -525.8458292 | -103.2891827 |
| 0.65  | 9.664615385 | 217.3218087  | -53.46398562 | -22.14056872 | -63.22958747 | -153.463055  | -72.76030127 | -352.4457339 | -85.76604924 | -560.2588096 | -118.7060874 |
| 0.7   | 8.974285714 | 212.3048993  | -57.92045827 | 17.44910163  | -68.56561905 | -178.9176854 | -75.22827263 | -390.5448323 | -96.8153285  | -526.5564732 | -127.6128878 |
| 0.75  | 8.376       | 239.713006   | -61.92452328 | -2.472451478 | -75.93546493 | -196.8278643 | -86.14948896 | -407.2604604 | -105.9213321 | -744.3849774 | -180.0926238 |
| 0.8   | 7.8525      | 213.1479525  | -67.16716405 | -86.43919672 | -84.59377422 | -220.1499323 | -98.31509554 | -413.4045635 | -127.9820058 | -733.3785535 | -209.4362096 |
| 0.85  | 7.390588235 | 168.765893   | -76.10399092 | -30.40050606 | -91.34074649 | -224.4995096 | -112.0939723 | -531.801499  | -167.0694217 | -624.5857507 | -216.6623941 |
| 0.9   | 6.98        | 223.3577069  | -81.60212416 | -31.13599894 | -103.6819365 | -217.4396951 | -125.0899176 | -407.6074988 | -162.2426725 | -848.0908399 | -383.9399637 |
| 0.95  | 6.612631579 | 204.5081392  | -87.20651909 | -23.93375301 | -114.0812152 | -166.0809333 | -135.7589073 | -512.6320242 | -232.5114635 | -884.1880446 | -540.5490985 |
| 1     | 6.282       | 137.3519141  | -105.761031  | -92.01947484 | -133.5607959 | -253.672396  | -167.6782882 | -758.0482431 | -532.2352243 | -1211.06811  | -0.242376544 |

**Supplement 2:** Untruncated estimates of single-ion diffusion coefficients for 0.8 M SrI<sub>2</sub> in D<sub>2</sub>O at the experimental temperatures

| Temperature | viscDovViscH | H2O_visc | H2O_rel visc | calc D_I_H2O | est D_I_D2O | Calc_D_Sr_H2O | est D_Sr_D2O |
|-------------|--------------|----------|--------------|--------------|-------------|---------------|--------------|
| 10          | 1.286        | 1.307    | 1.468044479  | 1.089885233  | 0.847500181 | 0.450940015   | 0.3506532    |
| 25          | 1.236        | 0.8903   | 1            | 1.6          | 1.294498382 | 0.662         | 0.535598706  |
| 30          | 1.224        | 0.7973   | 0.895540829  | 1.786629876  | 1.459664931 | 0.739218111   | 0.603936365  |
| 50          | 1.192        | 0.5467   | 0.614062676  | 2.60559722   | 2.185903708 | 1.07806585    | 0.904417659  |
| 70          | 1.174        | 0.4041   | 0.453891947  | 3.525068052  | 3.002613333 | 1.458496907   | 1.242331266  |
| 90          | 1.162        | 0.3149   | 0.353701     | 4.523594792  | 3.892938719 | 1.871637345   | 1.610703395  |

The calculated 25 °C data value for 0.8 M SrI<sub>2</sub> was adjusted to the experimental temperatures by dividing the two 25 °C diffusion coefficients listed above by the relative changes in H<sub>2</sub>O viscosity listed in the 4<sup>th</sup> column. These values were then divided by the viscosity ratios listed in the 2<sup>nd</sup> column to get the two sets of estimated diffusion coefficients listed: iodide in column 6 and strontium in column 8.

**Supplement 3:** *If classical transition state theory were used for diffusion: the  $k_B T/h$  contribution*

As reviewed by Peters et al., [Reaction rate theory and rare events, Elsevier, Amsterdam, 2017] classical TST does not apply to complex reaction surfaces such as for water self-diffusion. If classical TST were used, then the calculation of activation parameters from a  $T$ -dependent slope would include a contribution from  $k_B T/h$ . If the contribution were considered to be associated with  $\Delta^\ddagger S$ , then instead of

$$R \frac{d \ln D}{d \ln T} = \Delta^\ddagger S \quad (12)$$

we would use

$$R \frac{d \ln D}{d \ln T} = \Delta^\ddagger S + R \frac{d \ln(k_B T / h)}{d \ln T}$$

Since

$$\begin{aligned} \ln \frac{k_B T}{h} &= \ln \frac{k_B}{h} + \ln T \\ \frac{d \ln(k_B T / h)}{d(\ln T)} &= 0 + \frac{d \ln T}{d \ln T} = 1 \end{aligned}$$

so Equation 12 would be modified

$$R \frac{d \ln D}{d \ln T} = \Delta^\ddagger S + 1$$

the value of which is unitless as is the term  $\Delta^\ddagger S/R$ . Since the values of  $\Delta^\ddagger S$  are around 10 e.u., the slope due to the  $k_B T/h$  slope again is less than one fifth of the results. As a result, in cases where the  $k_B T/h$  term is included in an activation calculation, its contribution is  $T \text{ cal mol}^{-1}$  to  $\Delta^\ddagger G$ .

For d(1/T):

If the  $k_B T/h$  term's contribution were to be associated with  $E_a$ , the derivative needed is  $d(k_B T/h)/d(1/T)$ .

$$\frac{d \ln(k_B T / h)}{d(1/T)} = \frac{d \ln k_B}{d(1/T)} + \frac{d \ln T}{d(1/T)} - \frac{d \ln h}{d(1/T)} = 0 + \frac{d \ln T}{d(1/T)} - 0 \approx T$$

To see why the final value is about  $T$ , use the approximation to find the slope between  $(T+1)$  K and  $(T-1)$  K. Apply approximation

$$\ln(n-1) - \ln(n+1) \approx -2 \left[ \frac{1}{n} + \frac{1}{3n^3} + \dots \right]$$

Then for a  $2^\circ$  change in the numerator,  $\Delta_2^\circ \ln T \approx -2/T$ .

For the denominator,  
 $d(1/T) = (T \cdot 0 - 1 \cdot dT)/T^2$

which for a  $2^\circ$  change gives

$$d(1/T) = -dT/T^2.$$

So,

$$\frac{d \ln(k_B T / h)}{d(1/T)} \approx \frac{-2/T}{-dT/T^2} = T$$

with units of K. At 300 K the slope  $\approx 300$  K, and similarly for other Kelvin temperatures, and the slope has the same units as  $E_a/R$ . Since diffusion in the  $\text{SrI}_2$  has  $E_a$  over  $3000 \text{ cal mol}^{-1}$ ,  $E_a/R$  is at least five times as large.

Of course because both of the derivatives involve  $T$  and logarithms of the values, since only the product  $k_B T$  appears ( $k_B = 1.380658 \times 10^{-23} \text{ J K}^{-1} = 3.300 \times 10^{-24} \text{ cal K}^{-1}$ ) along with  $h$  ( $h = 6.626 \times 10^{-34} \text{ J}\cdot\text{s} = 1.583 \times 10^{-34} \text{ cal}\cdot\text{s}$ ) these fundamental values do not appear in the resulting derivatives.

### Supplement 4: One line or two?

Comparing the quality of the two-segment fit to the one-line fit may be calculated as follows. The data in the table shows the square of the residuals ( $d^2$ ) for each point. In order to compare the two sets and not double count the middle point, the larger of the two residual values is carried to the fifth column, which shows the  $d^2$  values for the broken line set.

The F-statistic for the two fits is

$$F = 0.0505 / 0.0026 = 19.4$$

from the two sums shown in the bolded cells.

With 4 degrees of freedom for each fit, the F-test table shows a value for 1% is 15.98. As a result, there is >99% certainty the broken line is a better fit to the data.

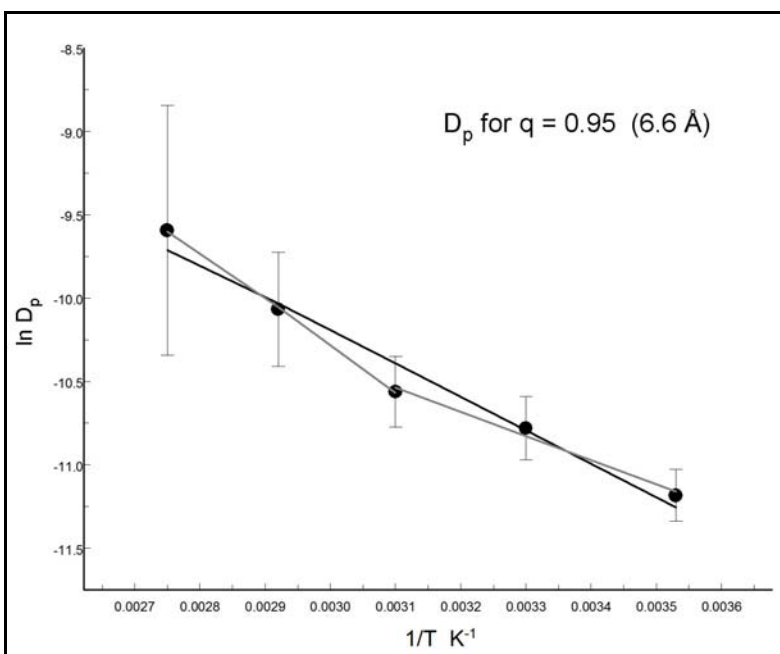

Graph: Plot of  $\ln D_p$  versus  $1/T$  for the value of  $q = 0.95$ , equivalent to a length scale of 6.6 Å. Two different fits are shown, one of a best straight line for all five points and also two straight line segments with a break at 50 °C. The uncertainties shown are from the counting statistics where the entire uncertainty for each has been attributed to the coherent part alone, which means these are overestimates.

Residuals and standard deviations of the mean for two fits to  $D_p$  data

| $\ln D_p$    | 5-point line<br>$d^2$ | 3-point Lower T<br>$d^2$ | 3-point Higher T<br>$d^2$ | Broken-line<br>$d^2$ | T/K |
|--------------|-----------------------|--------------------------|---------------------------|----------------------|-----|
| -11.1835     | 0.005256              | 0.000496377              |                           | 0.000496377          | 283 |
| -10.78       | 0.0002                | 0.002276063              |                           | 0.002276063          | 303 |
| -10.561      | 0.029386              | 0.000646613              | 3.30825E-05               | 0.000646613          | 323 |
| -10.0676     | 0.001256              |                          | 0.000149225               | 0.000149225          | 343 |
| -9.59394     | 0.014453              |                          | 4.17836E-05               | 4.17836E-05          | 363 |
| $\sum s_i^2$ | <b>0.0505511</b>      | 0.003419053              | 0.000224091               | <b>0.00296</b>       |     |



## Supplement 5:

*Comparing simulations for 1 M SrI<sub>2</sub> solutions in water with two different force fields*

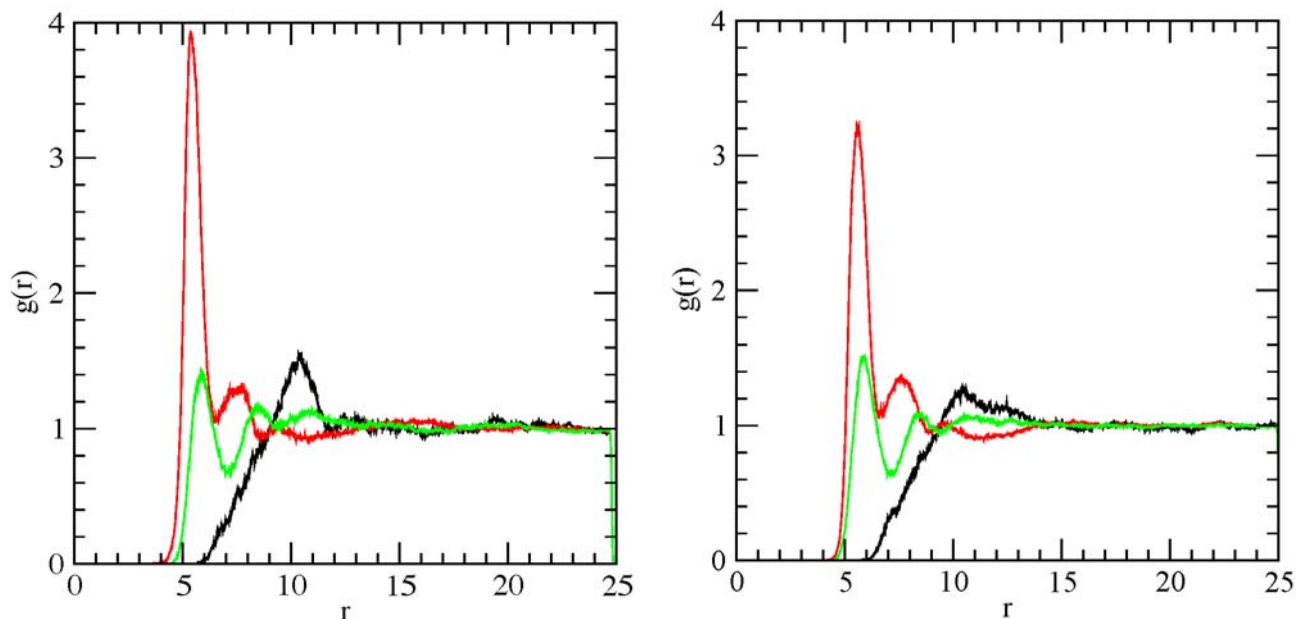

The figures show the radial distribution functions versus distance in Å calculated for 1 M SrI<sub>2</sub> aqueous solutions (3760 waters, 80 Sr<sup>2+</sup>, and 160 I<sup>-</sup>). Color key: red curve Sr–I, green curve I–I, black curve Sr–Sr. The left graph has Sr<sup>2+</sup> from the force field of Naleem et al.<sup>38</sup>, and the right graph from the force field of Deublein et al.<sup>40</sup>

In deriving the two different force fields, the groups optimized them by reproducing different experimental measurements for aqueous solutions of the strontium ions. Among the experimental physical properties being matched were:

In Naleem; The parameters were scaled to reproduce the Kirkwood-Buff force fields and then the results were compared to experimental values of activity derivatives, excess coordination numbers, partial molar volumes, translational self-diffusion coefficients, dielectric coefficients, enthalpy of mixing, and mean residence times for waters and anions around each cation.

In Deublein; the radial distribution function (RDF) of water around the cation, the hydration number of strontium, the potential of mean force between strontium and water, the hydration water residence time, the self-diffusion coefficient, the electric conductivity, and the enthalpy of hydration.

Because MD water is not triatomic H<sub>2</sub>O, one would not expect the calculations to include any relationship with the scattering contrast that might exist for, e.g., non-adjacent Sr–O, I–O, Sr–D, or I–D pairs.
